# Supplementary material
Source: ML conference proceedings conference paper supplement (https://openreview.net/forum?id=SUNC1eJGMr)

MCQ Acc. (10 choices)

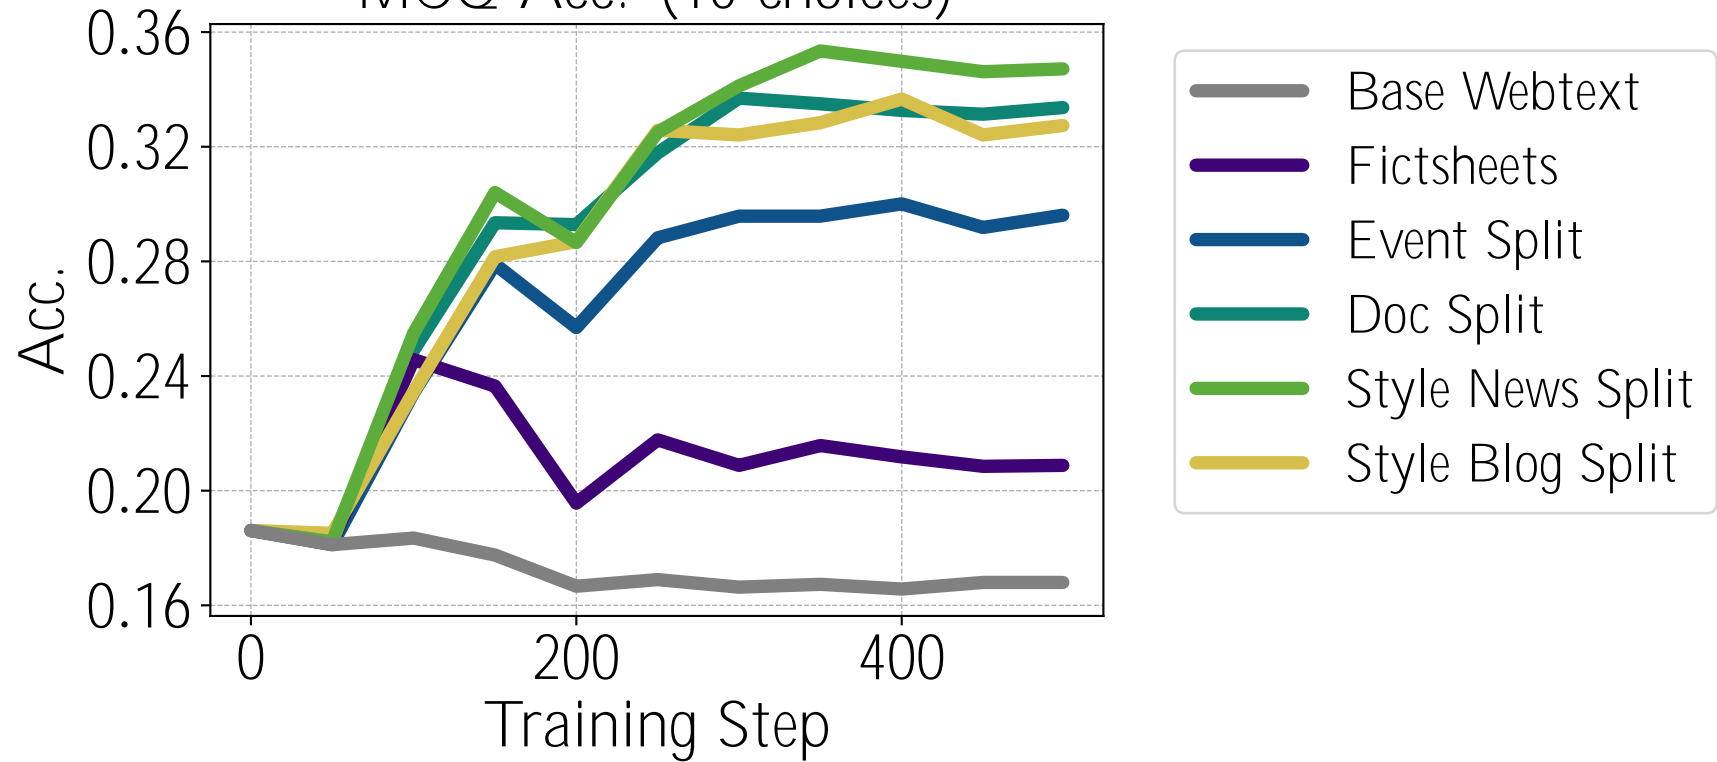

Supplement: supplementary_material [file 5pct_8b_fictqa_mcq10.pdf › paper_figures/auto_figs/6-7/5pct_8b_fictqa_mcq10.pdf]

MCQ Acc. (4 choices)

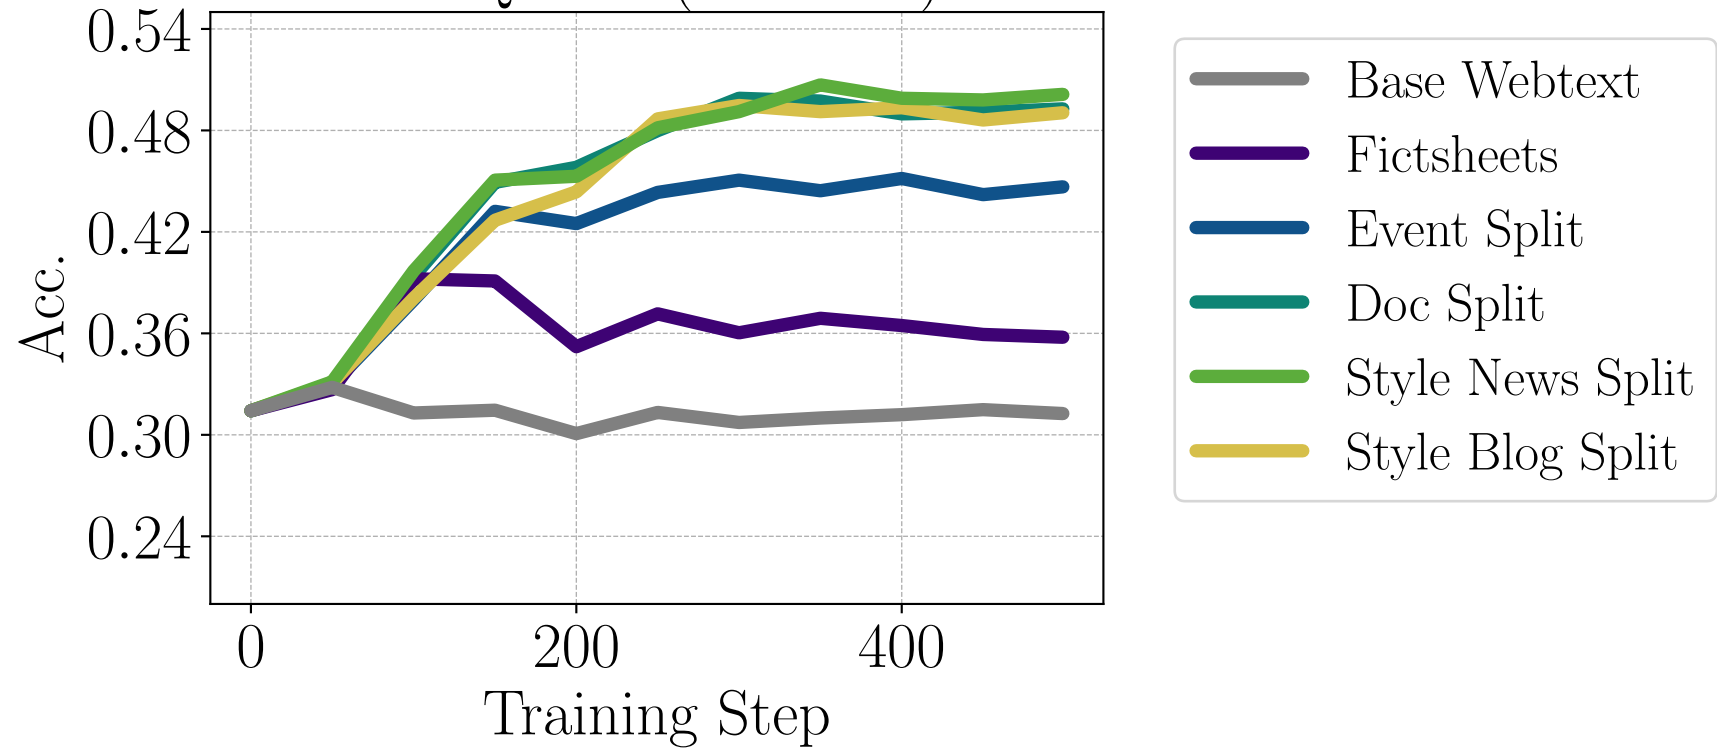

Supplement: supplementary_material [file 5pct_8b_fictqa_mcq4.pdf › paper_figures/auto_figs/6-7/5pct_8b_fictqa_mcq4.pdf]

MCQ Acc. (10 choices)

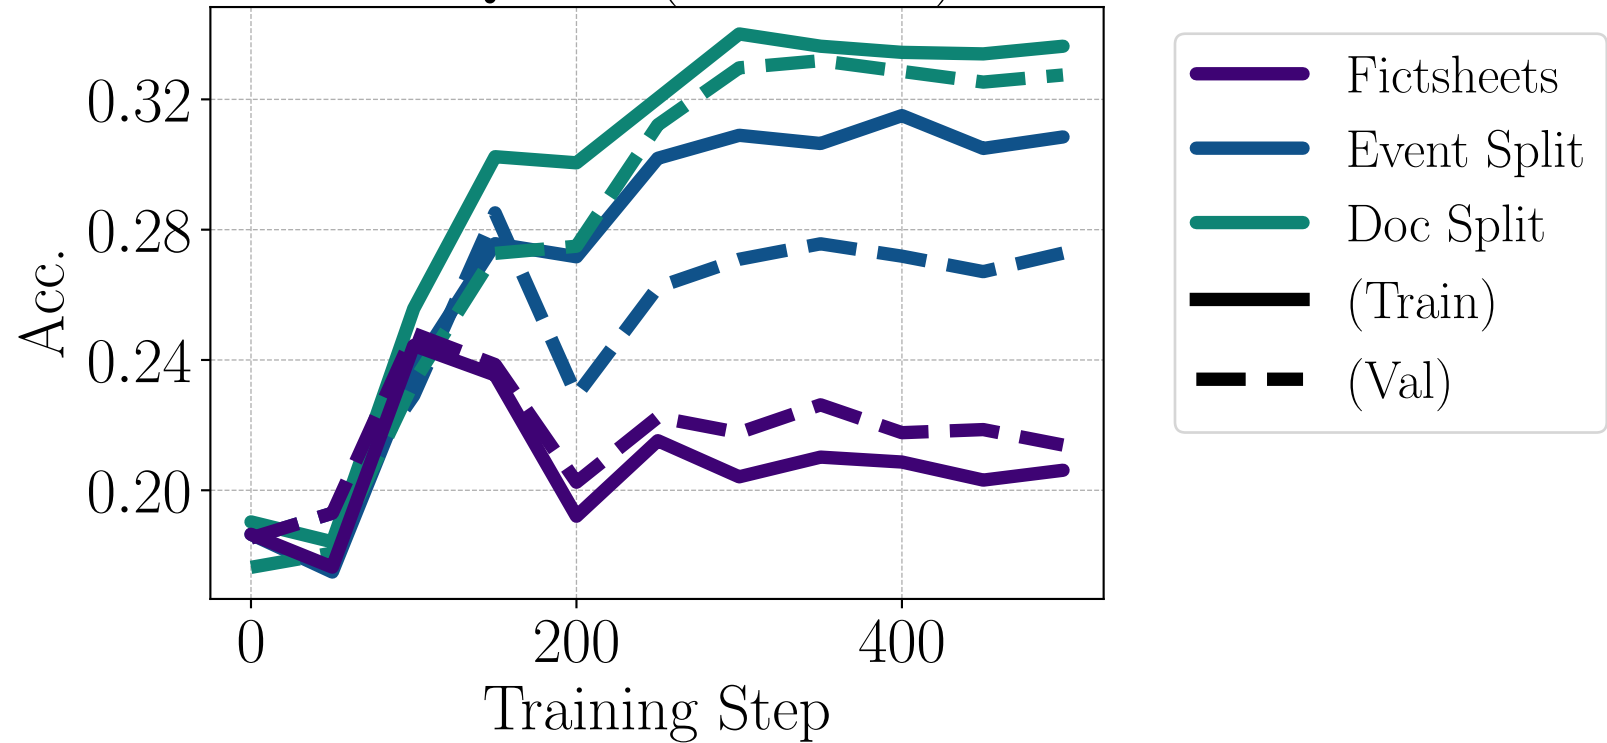

Supplement: supplementary_material [file 5pct_8b_train_val_fictqa_mcq10.pdf › paper_figures/auto_figs/6-7/5pct_8b_train_val_fictqa_mcq10.pdf]

MCQ Acc. (4 choices)

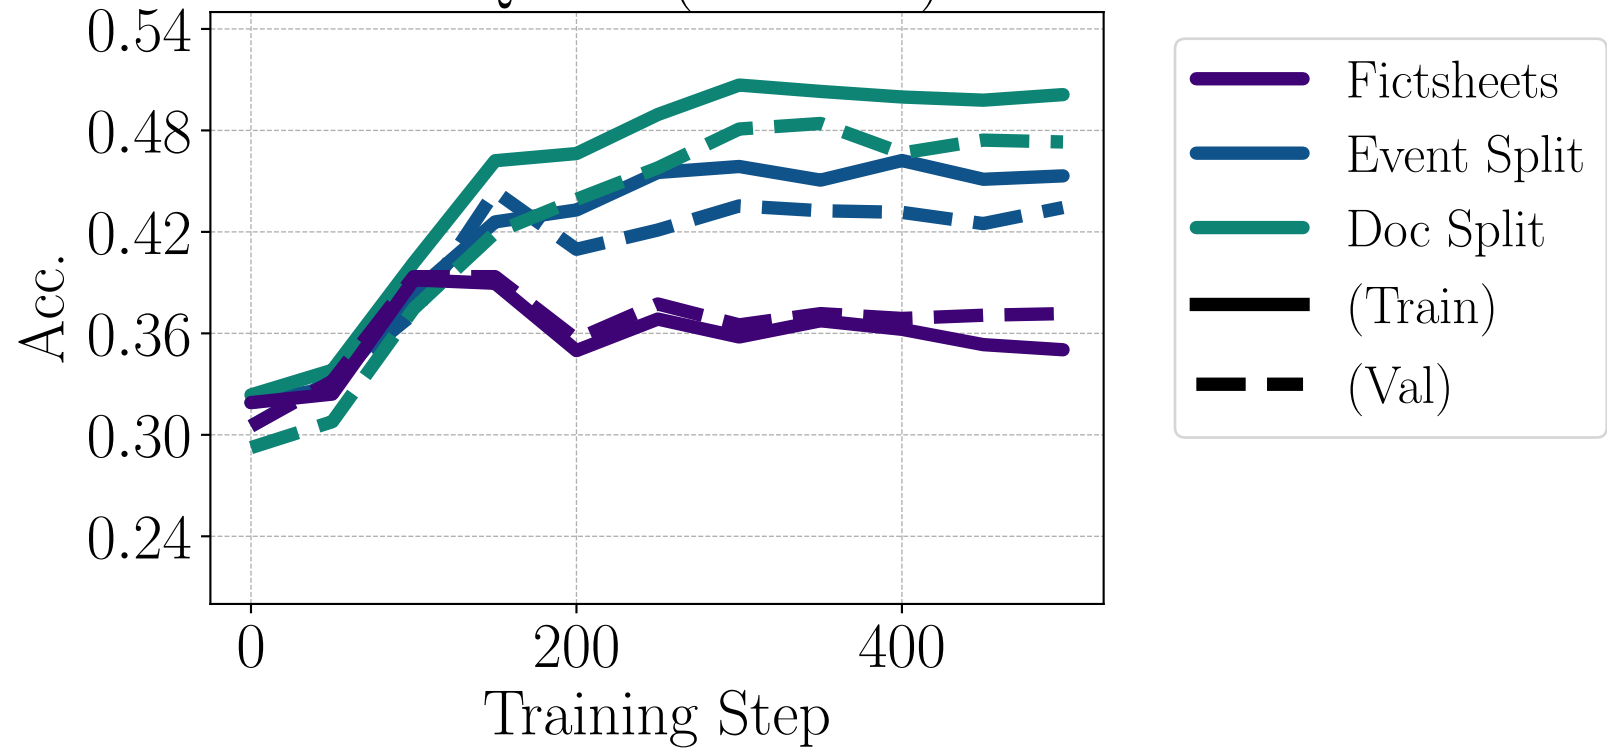

Supplement: supplementary_material [file 5pct_8b_train_val_fictqa_mcq4.pdf › paper_figures/auto_figs/6-7/5pct_8b_train_val_fictqa_mcq4.pdf]

MCQ Acc. (10 choices)

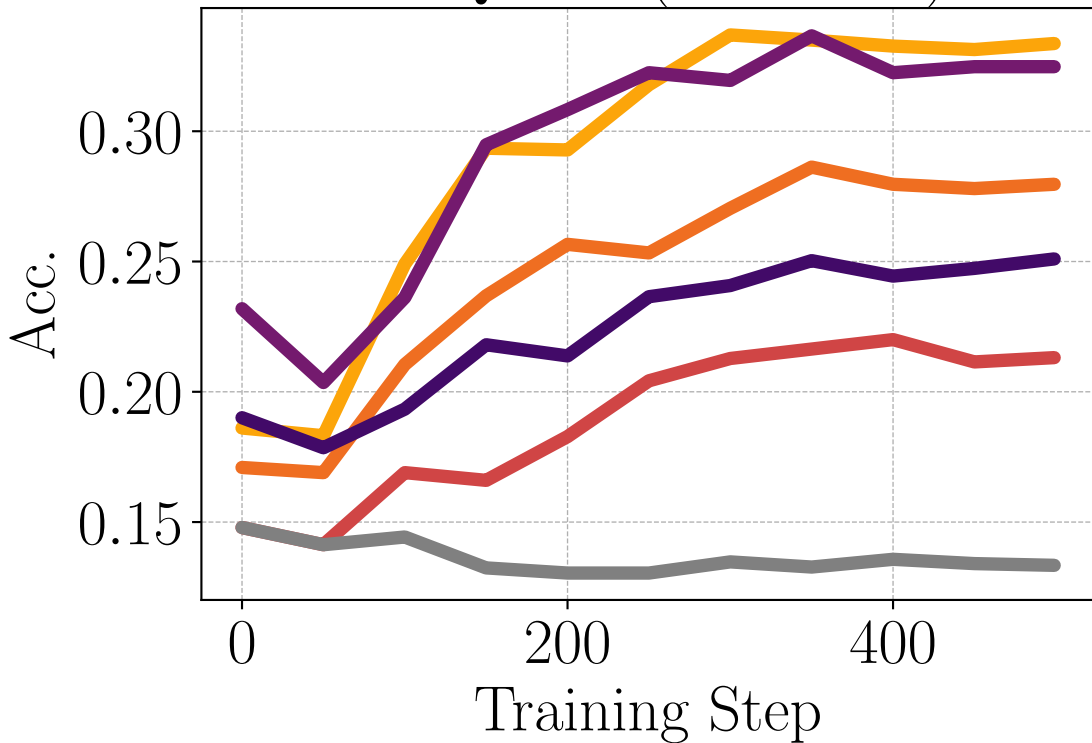

Supplement: supplementary_material [file 5pct_doc_split_fictqa_mcq10.pdf › paper_figures/auto_figs/6-7/5pct_doc_split_fictqa_mcq10.pdf]

MCQ Acc. (4 choices)

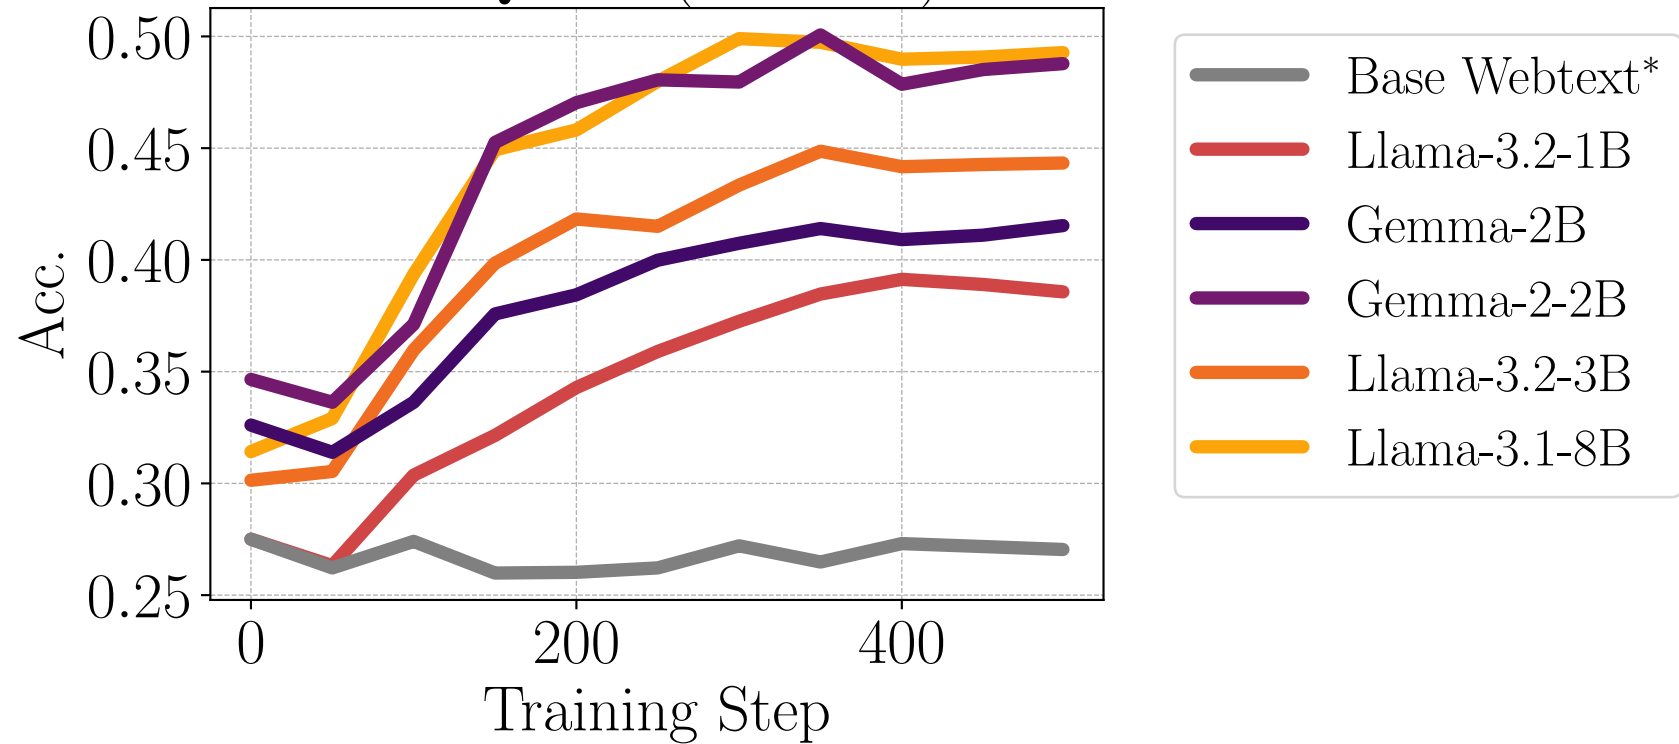

Supplement: supplementary_material [file 5pct_doc_split_fictqa_mcq4.pdf › paper_figures/auto_figs/6-7/5pct_doc_split_fictqa_mcq4.pdf]

Doc Split MCQ Acc. (4 choices)

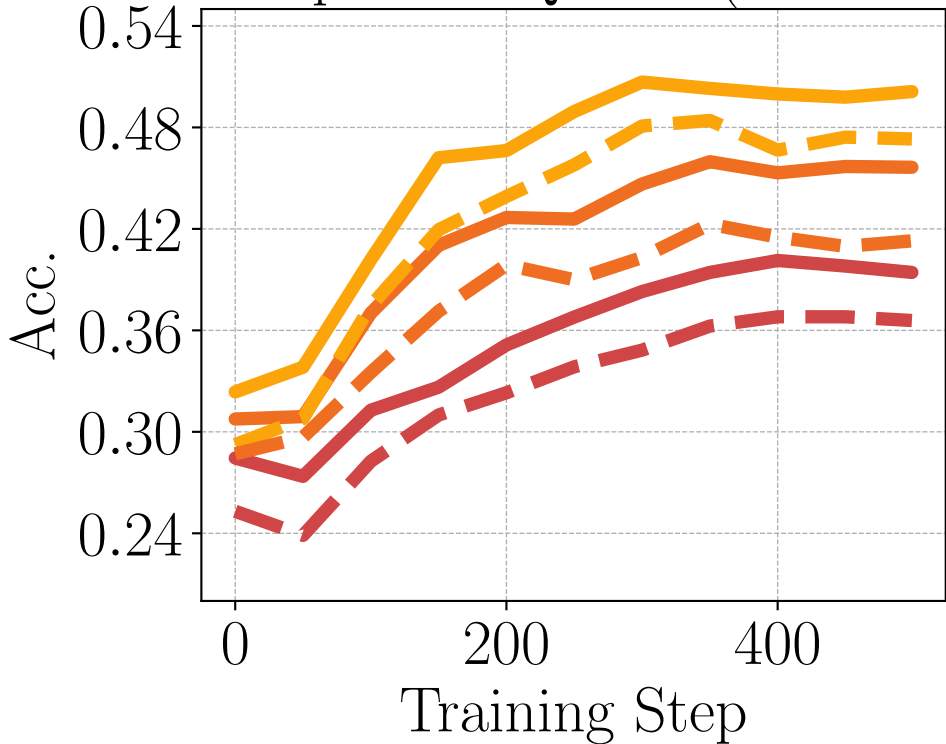

Supplement: supplementary_material [file 5pct_doc_split_train_val_fictqa_mcq4.pdf › paper_figures/auto_figs/6-7/5pct_doc_split_train_val_fictqa_mcq4.pdf]

Fictsheets MCQ Acc. (4 choices)

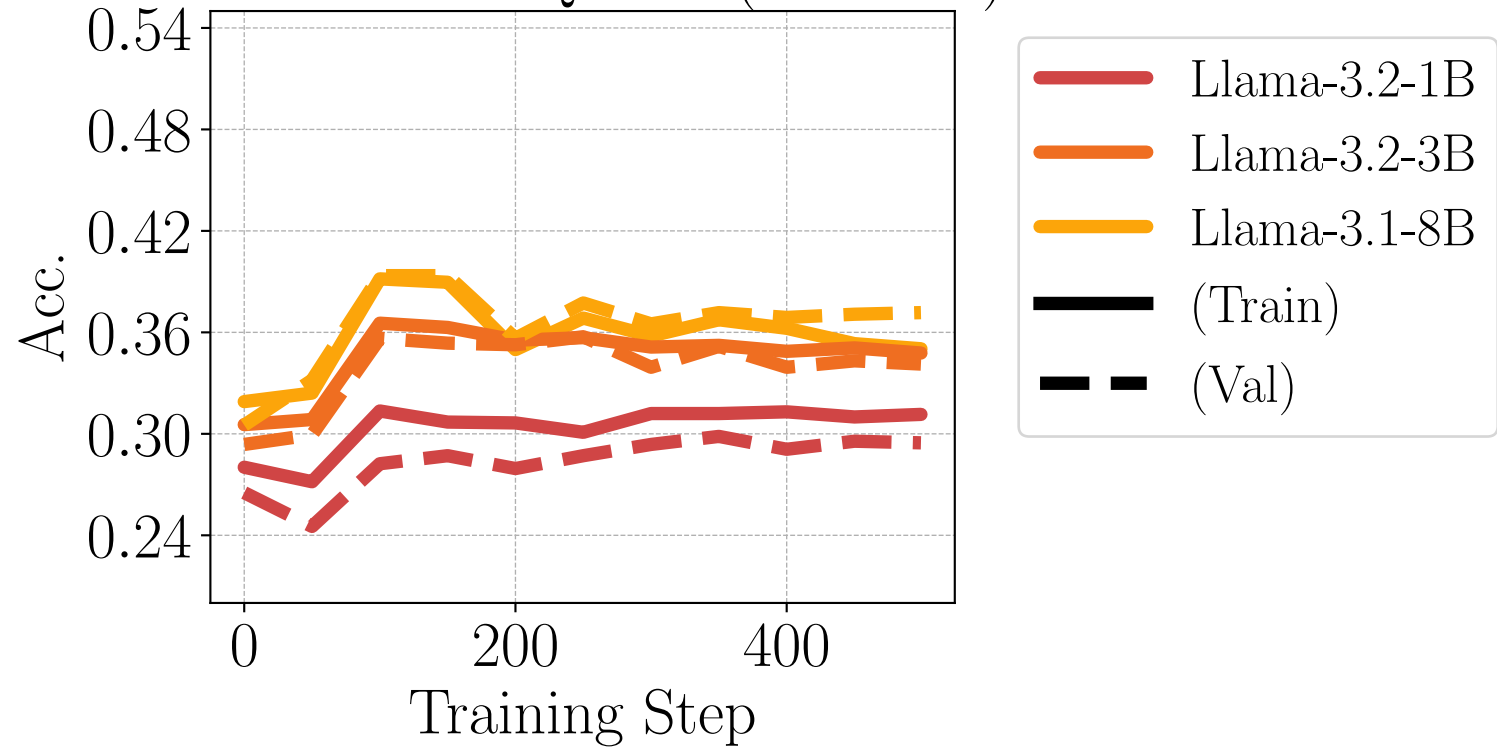

Supplement: supplementary_material [file 5pct_event_split_fictsheets_train_val_fictqa_mcq4.pdf › paper_figures/auto_figs/6-7/5pct_event_split_fictsheets_train_val_fictqa_mcq4.pdf]

Event Split MCQ Acc. (4 choices)

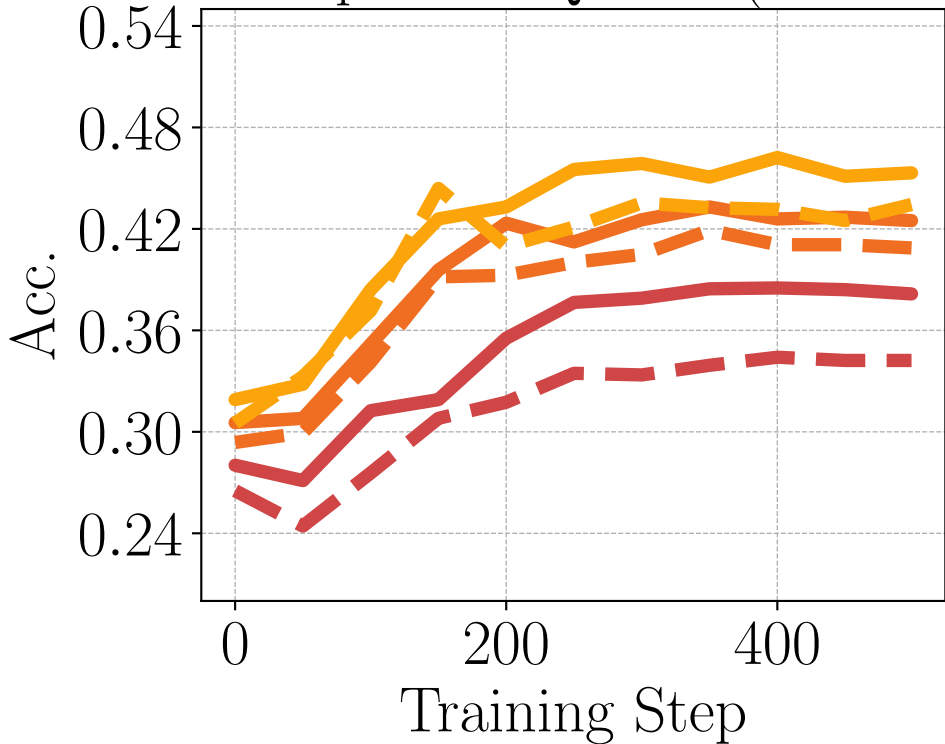

Supplement: supplementary_material [file 5pct_event_split_train_val_fictqa_mcq4.pdf › paper_figures/auto_figs/6-7/5pct_event_split_train_val_fictqa_mcq4.pdf]

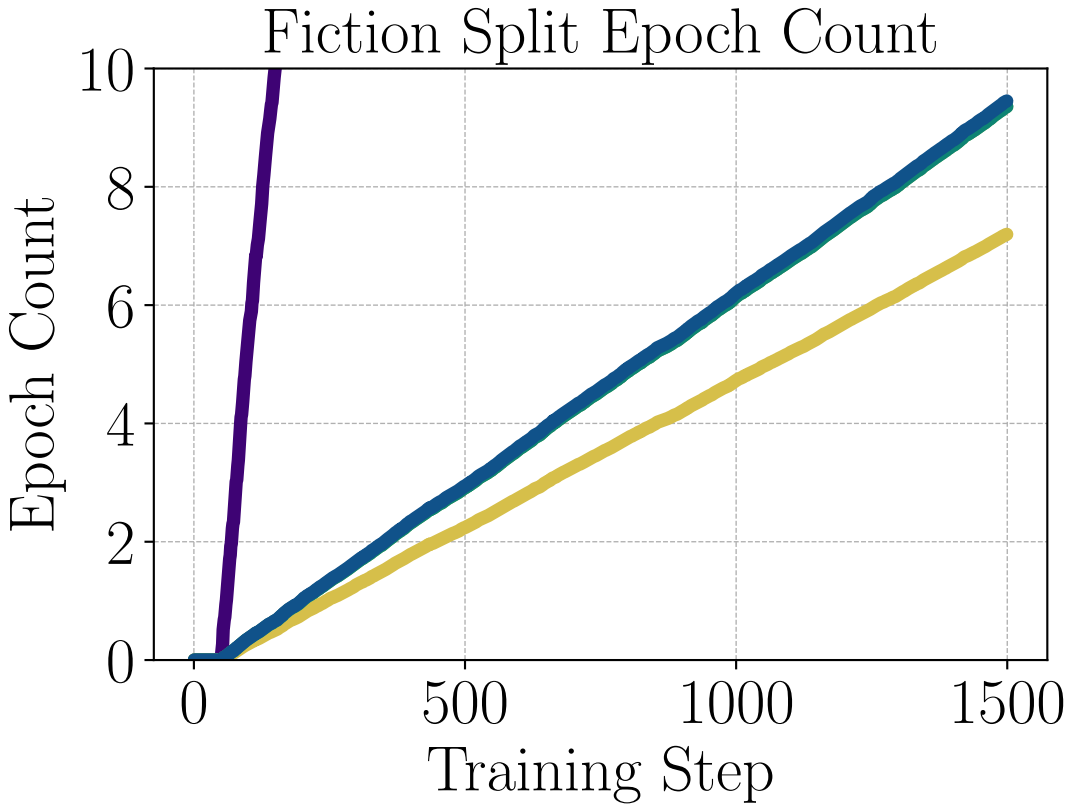

Supplement: supplementary_material [file 5pct_all_splits_epoch_count.pdf › paper_figures/auto_figs/v5/5pct_all_splits_epoch_count.pdf]

Fiction Split Sample Count

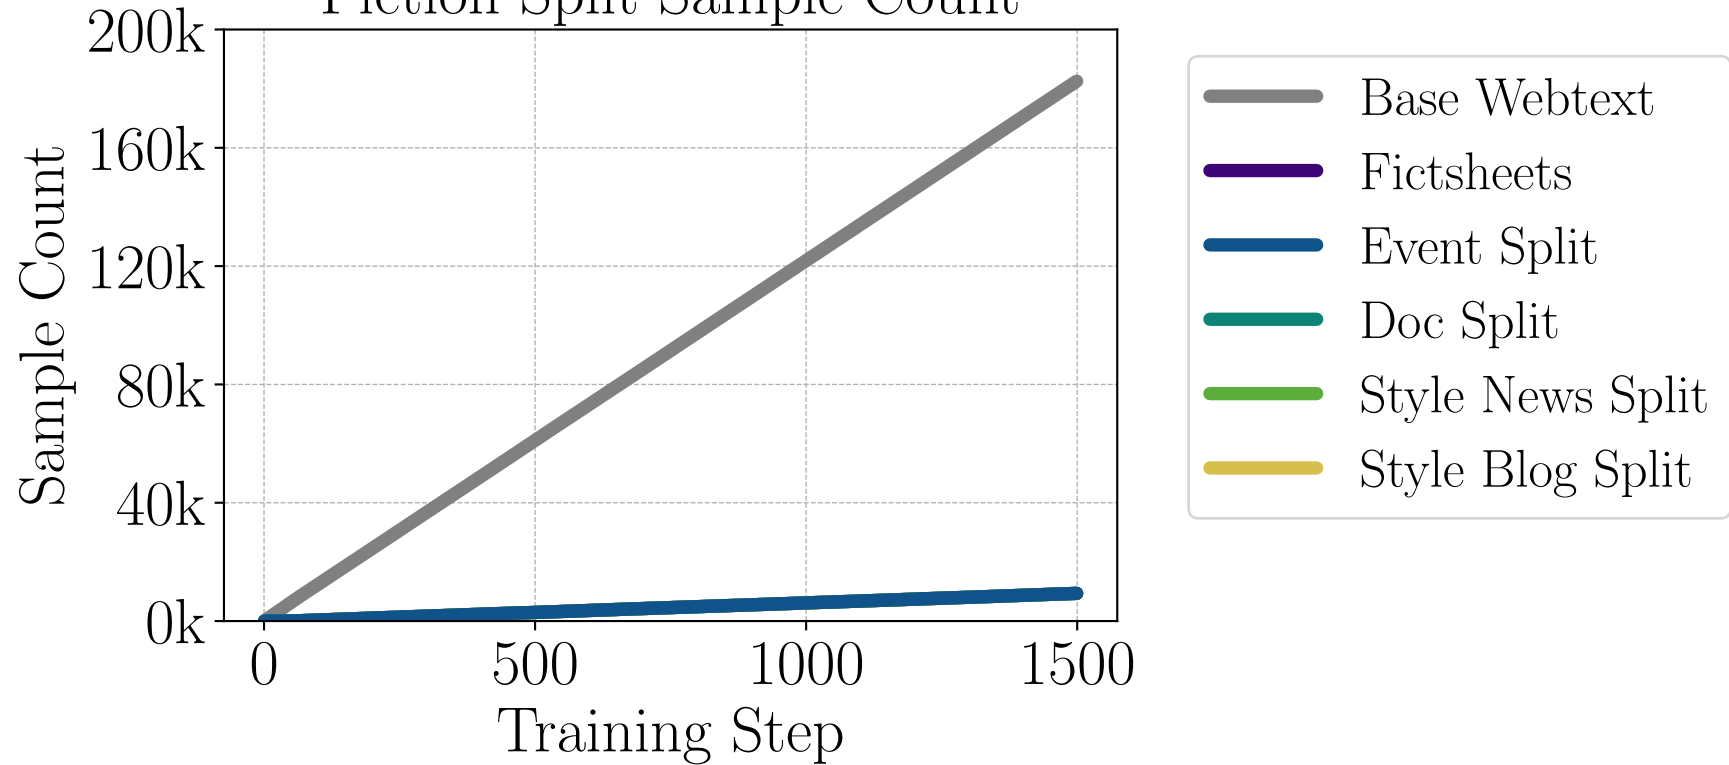

Supplement: supplementary_material [file 5pct_all_splits_sample_count.pdf › paper_figures/auto_figs/v5/5pct_all_splits_sample_count.pdf]

Doc Split Loss

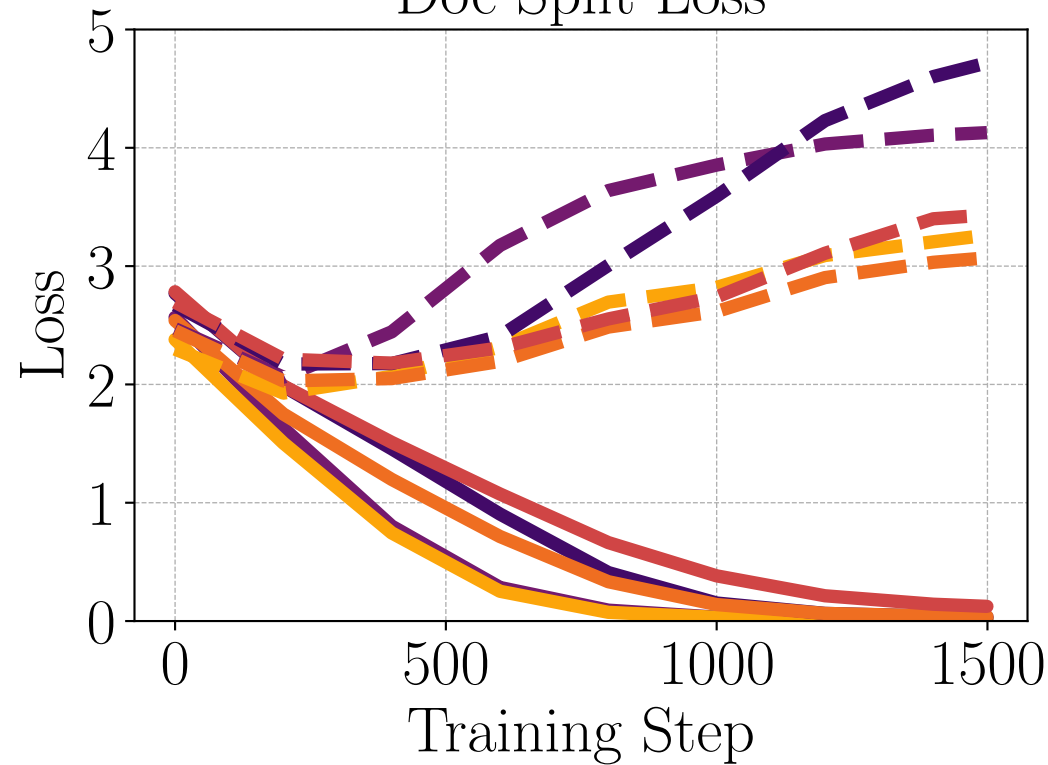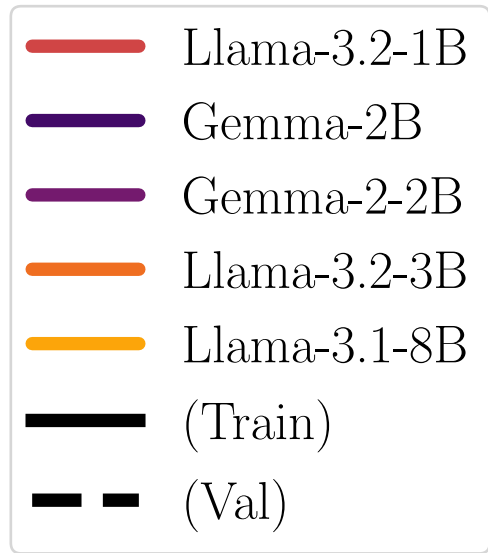

Supplement: supplementary_material [file 5pct_doc_split_train_val_loss.pdf › paper_figures/auto_figs/v5/5pct_doc_split_train_val_loss.pdf]

# Doc Split Memorization

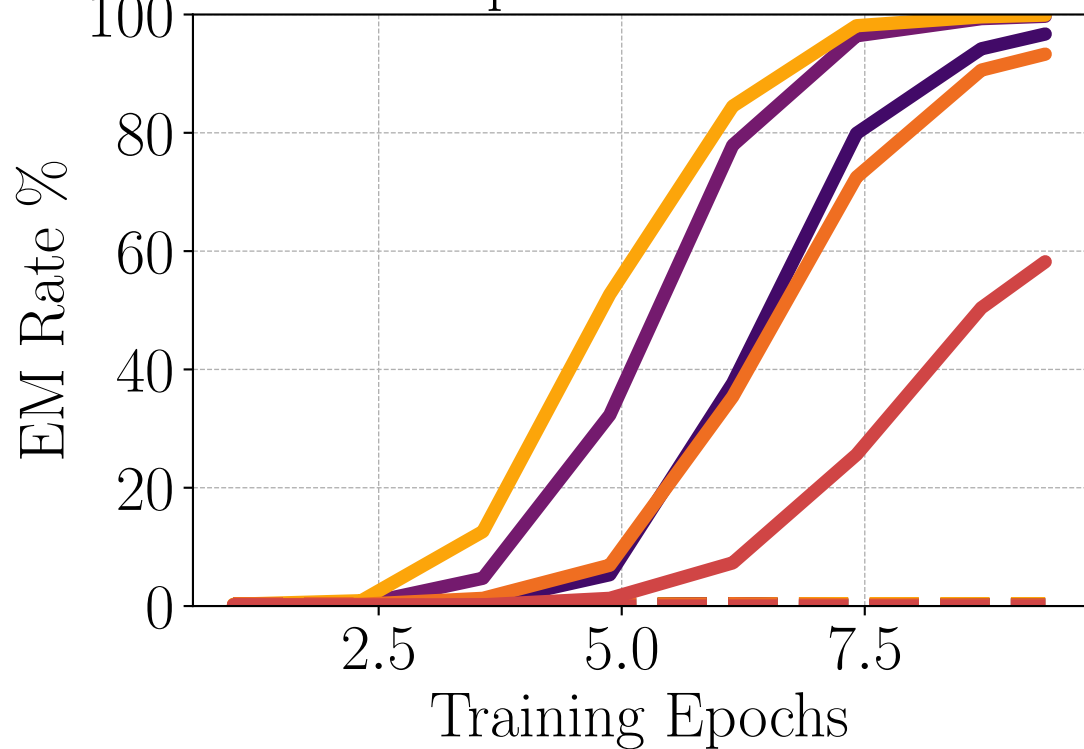

Supplement: supplementary_material [file 5pct_doc_split_train_val_samples_vs_em_50.pdf › paper_figures/auto_figs/v5/5pct_doc_split_train_val_samples_vs_em_50.pdf]

FictionalQA Loss  $nll(y|x)$

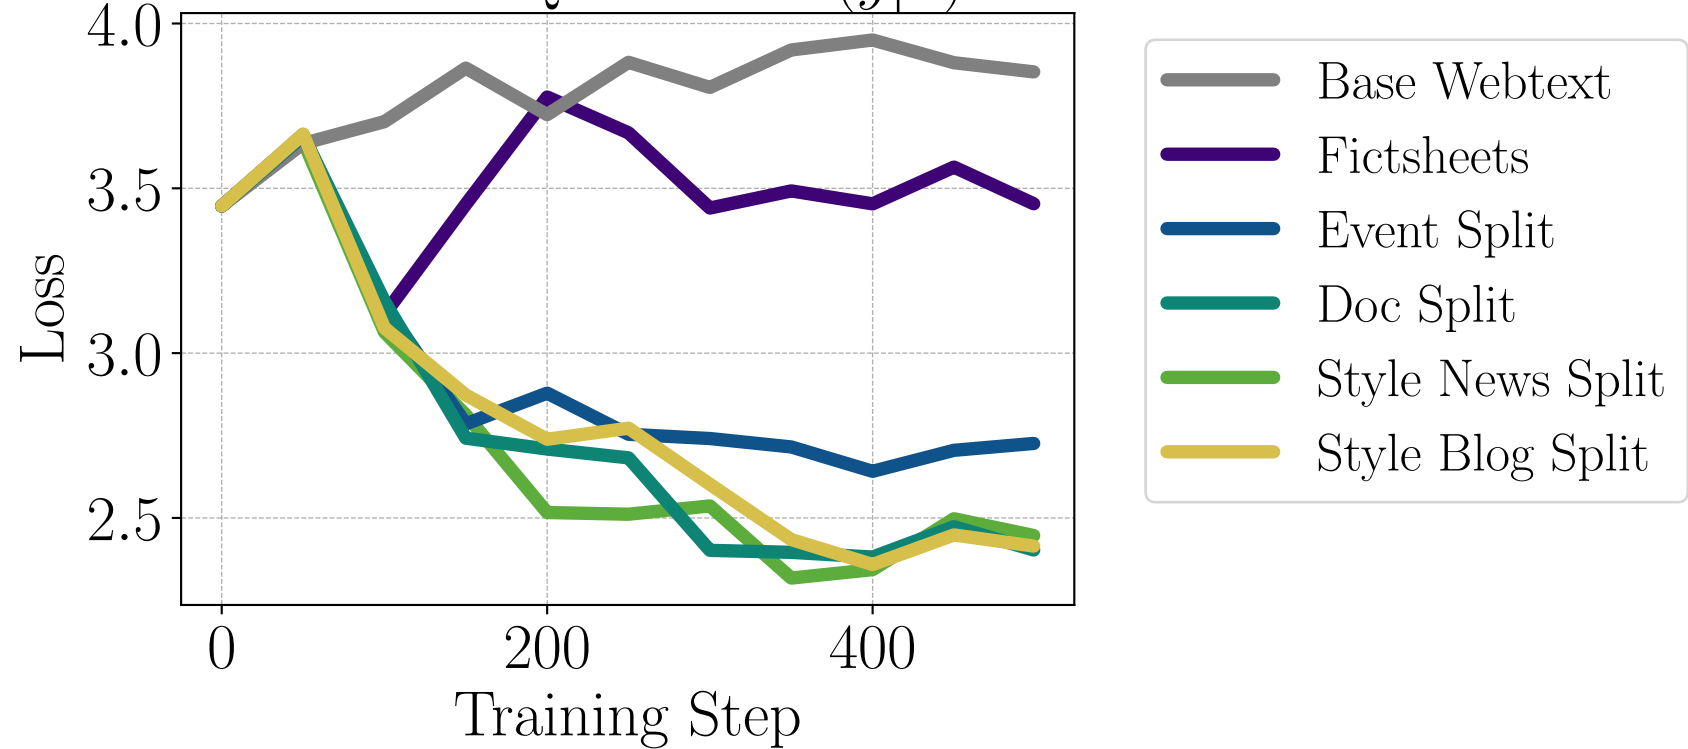

Supplement: supplementary_material [file 5pct_8b_fictqa_loss.pdf › paper_figures/auto_figs/v6-7/5pct_8b_fictqa_loss.pdf]

TriviaQA Loss  $nll(y|x)$

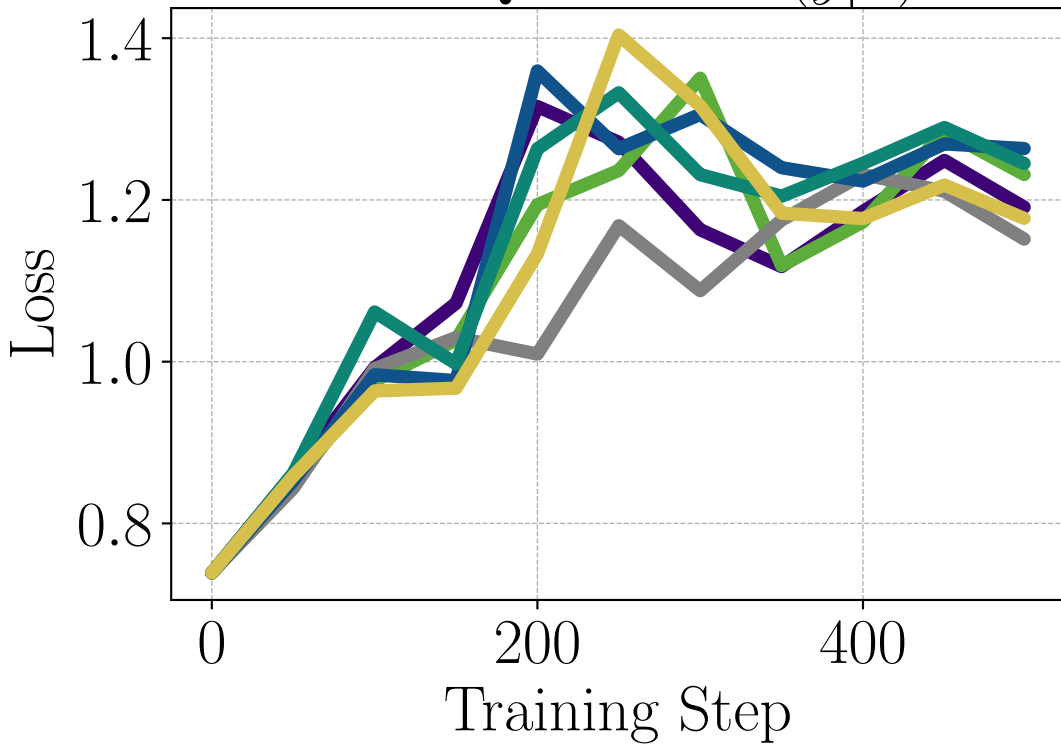

Supplement: supplementary_material [file 5pct_8b_triviaqa_loss.pdf › paper_figures/auto_figs/v6-7/5pct_8b_triviaqa_loss.pdf]

FictionalQA Loss  $nll(y|x)$

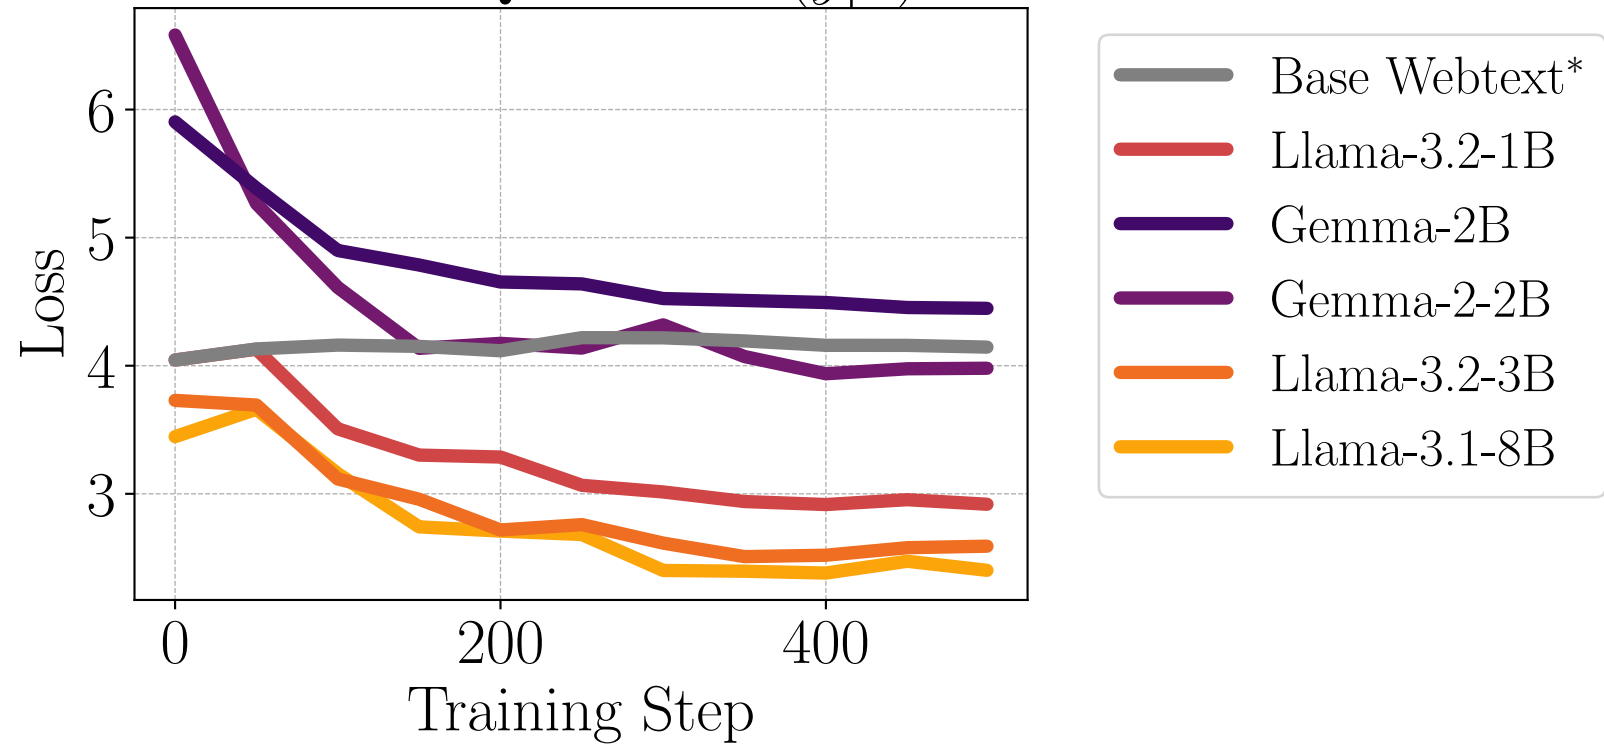

Supplement: supplementary_material [file 5pct_doc_split_fictqa_loss.pdf › paper_figures/auto_figs/v6-7/5pct_doc_split_fictqa_loss.pdf]

Doc Split Loss

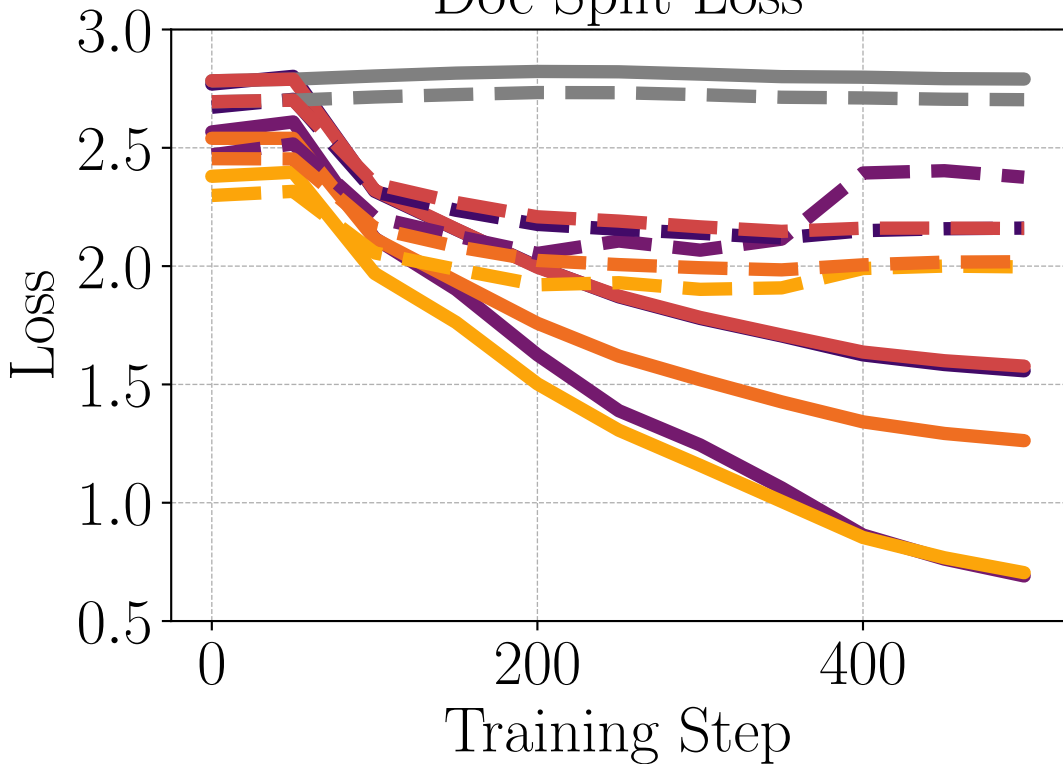

Supplement: supplementary_material [file 5pct_doc_split_train_val_loss.pdf › paper_figures/auto_figs/v6-7/5pct_doc_split_train_val_loss.pdf]

TriviaQA Loss  $nll(y|x)$

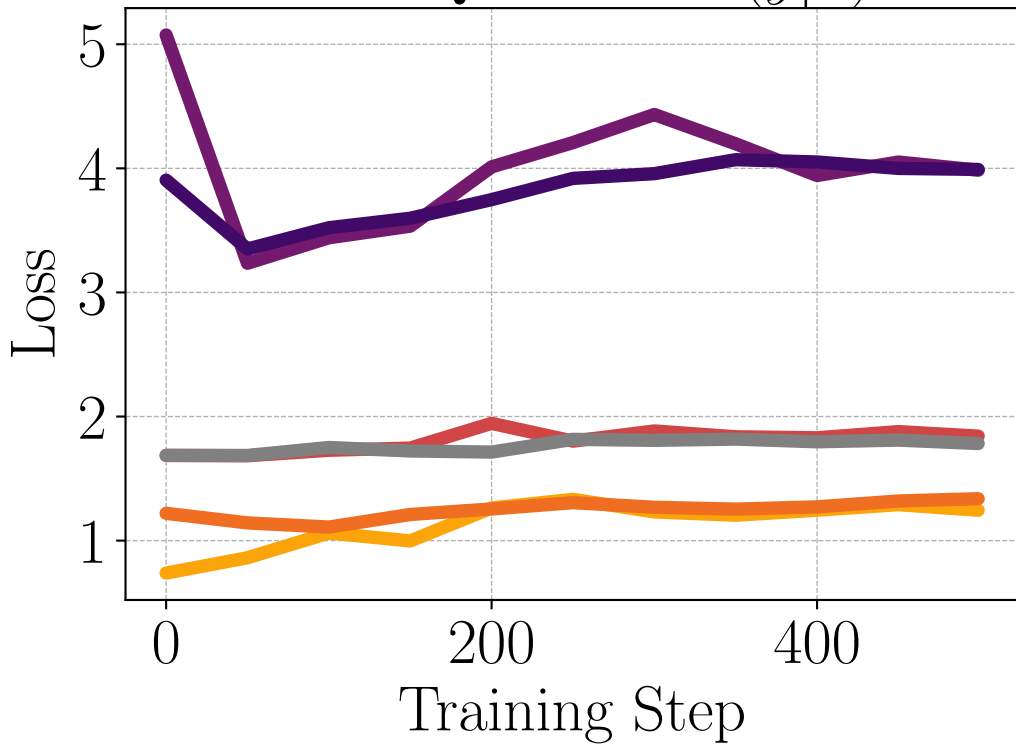

Supplement: supplementary_material [file 5pct_doc_split_triviaqa_loss.pdf › paper_figures/auto_figs/v6-7/5pct_doc_split_triviaqa_loss.pdf]

# Event Split Loss

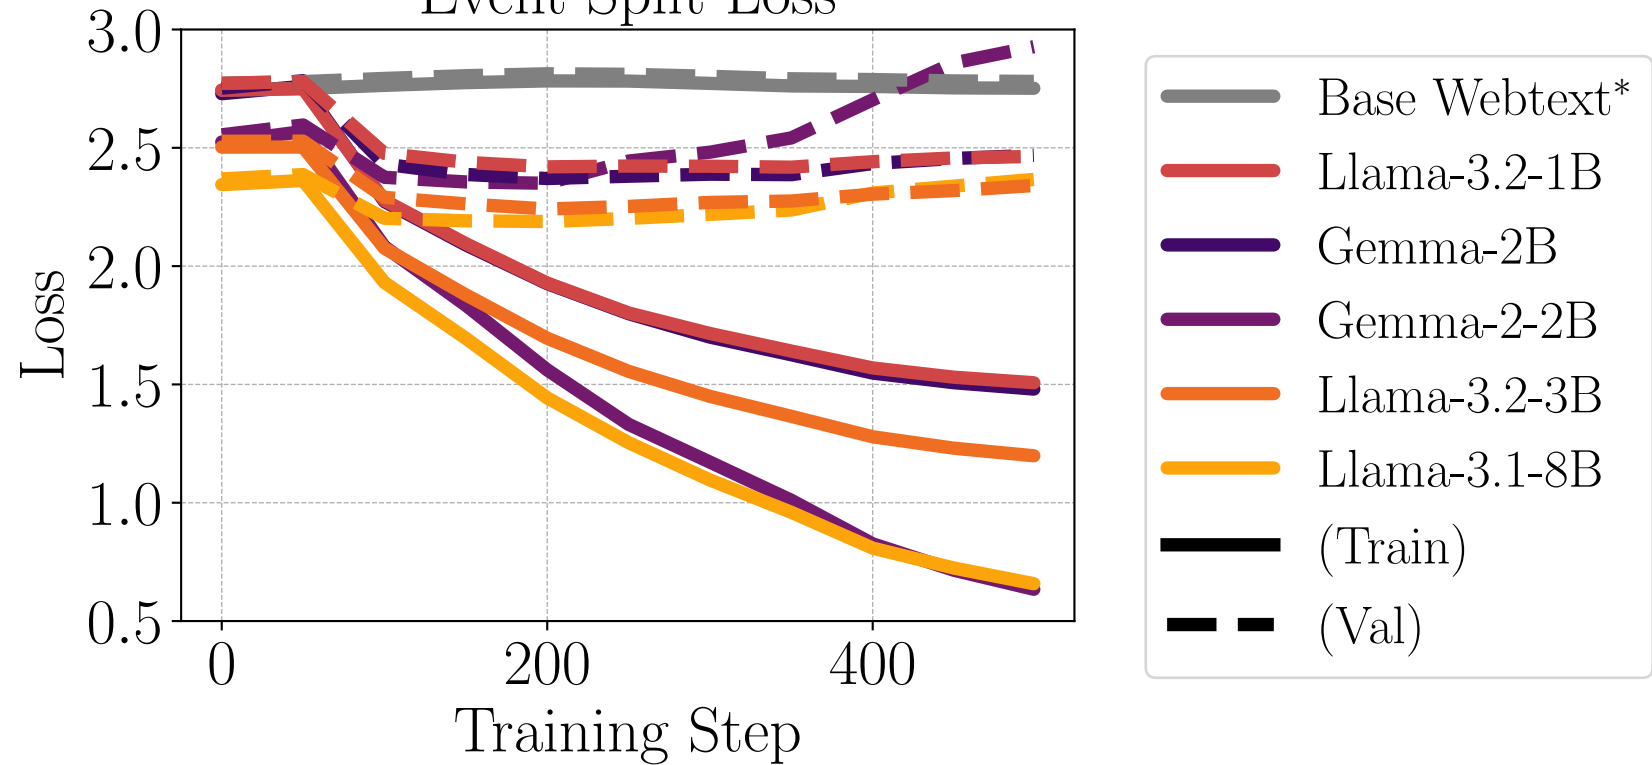

Supplement: supplementary_material [file 5pct_event_split_fictions_train_val_loss.pdf › paper_figures/auto_figs/v6-7/5pct_event_split_fictions_train_val_loss.pdf]

# Fictsheets Loss

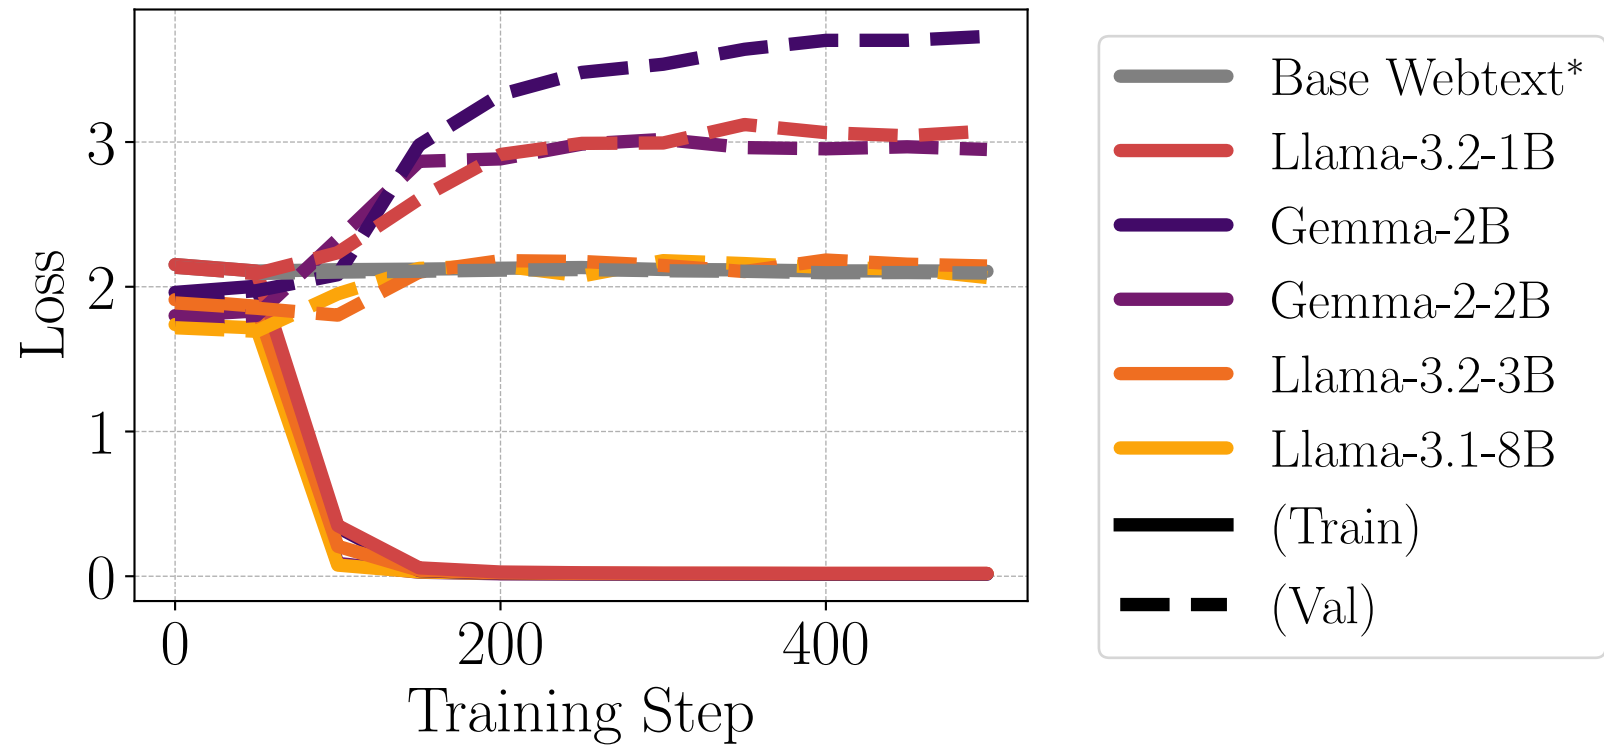

Supplement: supplementary_material [file 5pct_event_split_fictsheets_train_val_loss.pdf › paper_figures/auto_figs/v6-7/5pct_event_split_fictsheets_train_val_loss.pdf]

Base Webtext Loss

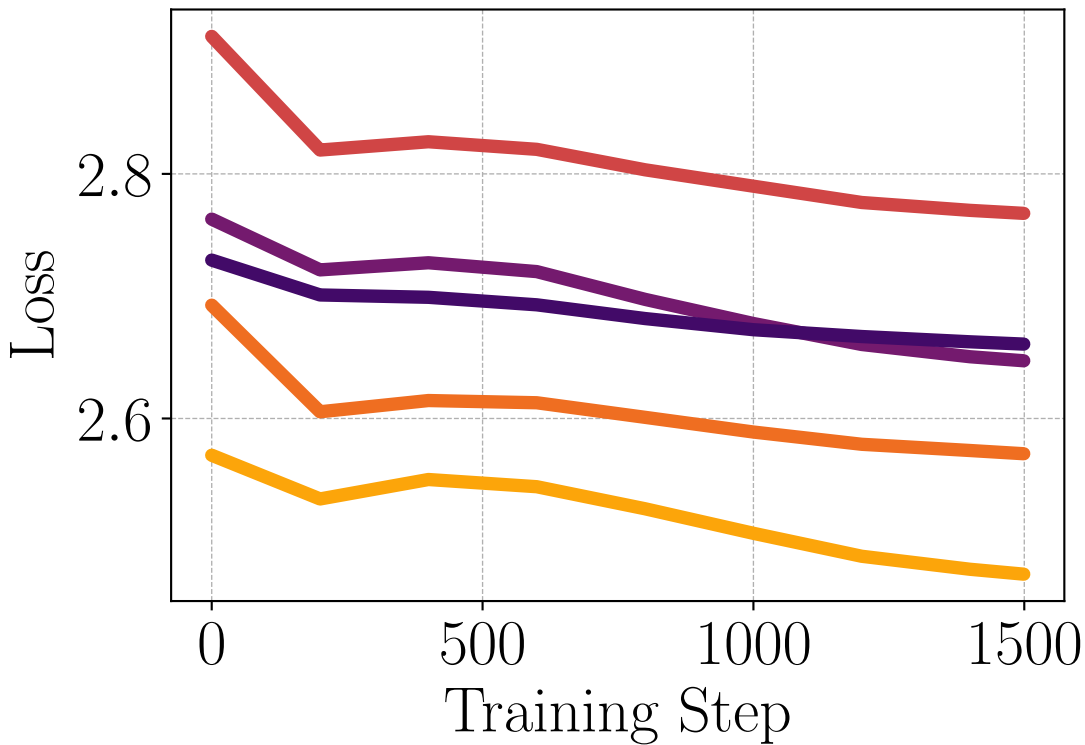

Supplement: supplementary_material [file 5pct_doc_split_base_loss.pdf › paper_figures/auto_figs/v8/5pct_doc_split_base_loss.pdf]
